# Supplementary material
Source: publisher figshare collection journal article supplement (https://acs.figshare.com/ndownloader/files/22461974)
Supplement: Supplementary file 1 [file 22461974]

# Supporting Information

## The Anisotropic Transport Property of Antimonene MOSFETs

*Yiheng Yin<sup>†</sup>, Chen Shao<sup>†</sup>, Can Zhang<sup>†</sup>, Zhaofu Zhang<sup>‡</sup>, \* , Xuwei Zhang<sup>‡</sup>, John Robertson<sup>†</sup>, <sup>‡</sup> and Yuzheng Guo<sup>†</sup>, \**

<sup>†</sup> School of Electrical Engineering, Wuhan University, Wuhan, Hubei 430072, China

<sup>‡</sup> Department of Engineering, Cambridge University, Cambridge, CB2 1PZ, United Kingdom

\* E-mail: [zz389@cam.ac.uk](mailto:zz389@cam.ac.uk), \* E-mail: [yguo@whu.edu.cn](mailto:yguo@whu.edu.cn)

**Table S1.** The transmission directions calculated in this paper.

|                                                |                |                |                |                |                |                |
|------------------------------------------------|----------------|----------------|----------------|----------------|----------------|----------------|
| Transmission direction $\theta$ ( $^{\circ}$ ) | $0^{\circ}$    | $4.7^{\circ}$  | $8.9^{\circ}$  | $10.9^{\circ}$ | $13.9^{\circ}$ | $14.7^{\circ}$ |
| (m,n)                                          | (1,0)          | (1,10)         | (1,5)          | (1,4)          | (1,3)          | (5,14)         |
| Transmission direction $\theta$ ( $^{\circ}$ ) | $15.3^{\circ}$ | $16.1^{\circ}$ | $19.1^{\circ}$ | $21.1^{\circ}$ | $25.3^{\circ}$ | $30^{\circ}$   |
| (m,n)                                          | (3,8)          | (2,5)          | (1,2)          | (4,7)          | (3,4)          | (0,1)          |

**Table S2.** Requirements of ITRS for HP transistors.

|              |                  |                      |              |                             |
|--------------|------------------|----------------------|--------------|-----------------------------|
|              | $L_g$ (nm)       | EOT (nm)             | $V_{dd}$ (V) | $I_{off}$ ( $\mu A/\mu m$ ) |
| ITRS HP 2028 | 5.1              | 0.41                 | 0.64         | 0.1                         |
|              | $I_{on}/I_{off}$ | $C_g$ (fF/ $\mu m$ ) | $\tau$ (ps)  | PDP (fJ/ $\mu m$ )          |
| ITRS HP 2028 | $9 \times 10^3$  | 0.60                 | 0.423        | 0.24                        |

Transfer I-V curves of 4nm gate length ML antimonene MOSFETs along  $0^\circ$  direction are taken as examples to compare the performance three different doping concentrations and UL length ranging from 0 to 2 nm. The results of transfer I-V curves are shown in Figure S1. The detailed  $I_{on}$  and SS data are shown in Table S3. The influence of different doping concentrations on leakage and on-state current can be seen in Table S4 below. The  $I_{DS8}/I_{DS6}$  is the ratio of  $I_{DS}$  with  $8.0 \times 10^{13} \text{ cm}^{-2}$  and  $6.0 \times 10^{13} \text{ cm}^{-2}$  doping concentration, respectively.  $I_{DS6}/I_{DS4}$  is the ratio of  $I_{DS}$  with  $6.0 \times 10^{13} \text{ cm}^{-2}$  and  $4.0 \times 10^{13} \text{ cm}^{-2}$  doping concentration, respectively. It can be seen clearly that the promotion to leakage current ( $V_{GS}$  from -0.6 V to -0.3 V) is much higher than to the maximum current ( $V_{GS}$  from 0.2 V to 0.5 V) by increasing doping concentrations. Inversely, devices can effectively suppress SCE by extending UL length at the cost of  $I_{on}$ . Therefore, the  $6.0 \times 10^{13} \text{ cm}^{-2}$  doping concentration coupled with 0 nm and 1 nm UL are selected to guarantee a sufficient drain current and relatively low leakage current.

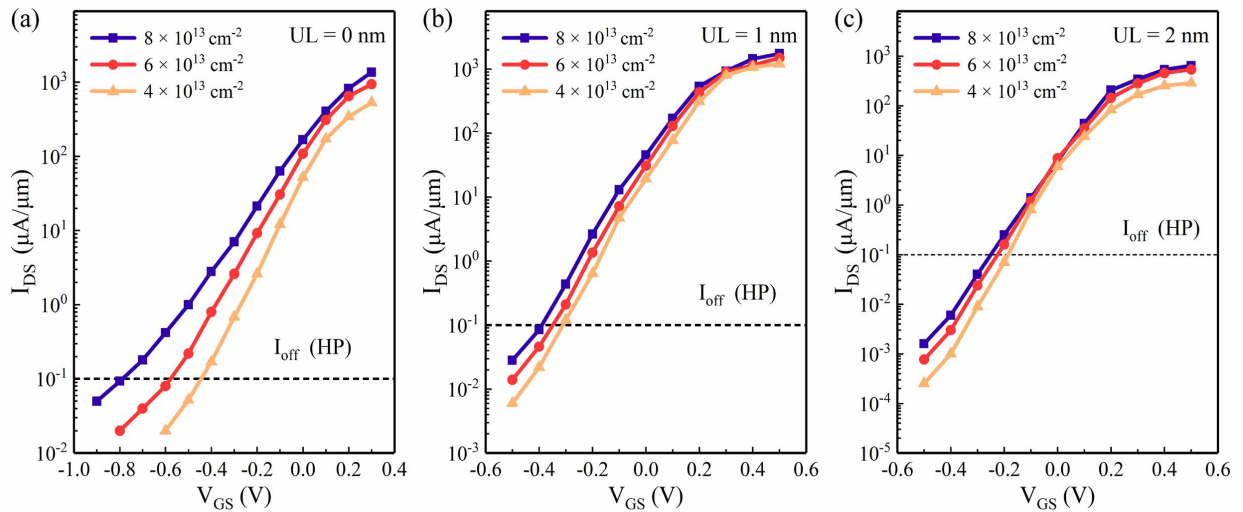

**Figure S1** The transfer I-V curves of antimonene MOSFETs along  $0^\circ$  direction as functions of doping concentrations and UL length. The dashed lines represent ITRS HP off-state ( $I_{\text{off}}$  (HP)) threshold current in (a-c).

**Table S3.**  $I_{\text{on}}$  and SS of MOSFETs along  $0^\circ$  direction as functions of doping concentrations and UL length.

| Doping concentration<br>( $e/\text{cm}^{-2}$ ) |                                               | UL = 0 nm | UL = 1 nm | UL = 2 nm |
|------------------------------------------------|-----------------------------------------------|-----------|-----------|-----------|
| $4.0 \times 10^{13}$                           | $I_{\text{on}}$ ( $\mu\text{A}/\mu\text{m}$ ) | 323       | 470       | 251       |
|                                                | SS (mV/dev)                                   | 127       | 110       | 102       |
| $6.0 \times 10^{13}$                           | $I_{\text{on}}$ ( $\mu\text{A}/\mu\text{m}$ ) | 312       | 1002      | 494       |
|                                                | SS (mV/dev)                                   | 148       | 124       | 113       |
| $8.0 \times 10^{13}$                           | $I_{\text{on}}$ ( $\mu\text{A}/\mu\text{m}$ ) | 68        | 926       | 533       |
|                                                | SS (mV/dev)                                   | 201       | 143       | 128       |

**Table S4.**  $I_{\text{DS}}$  ratio of zigzag antimonene MOSFETs with different UL length.

| $V_{\text{GS}}$                      | -0.6V | -0.5V | -0.4V | -0.3V | ... | 0.2V | 0.3V | 0.4V | 0.5V |
|--------------------------------------|-------|-------|-------|-------|-----|------|------|------|------|
| UL = $I_{\text{DS8}}/I_{\text{DS6}}$ | 5.3   | 4.5   | 3.5   | 2.7   | ... | 1.3  | 1.4  | -    | -    |
| 0nm $I_{\text{DS6}}/I_{\text{DS4}}$  | 4.0   | 4.2   | 4.7   | 3.8   | ... | 1.9  | 1.8  | -    | -    |
| UL = $I_{\text{DS8}}/I_{\text{DS6}}$ |       | 2.0   | 1.9   | 1.8   | ... | 1.2  | 1.0  | 1.3  | 1.2  |
| 1nm $I_{\text{DS6}}/I_{\text{DS4}}$  |       | 2.3   | 2.1   | 2.0   | ... | 1.4  | 1.1  | 1.1  | 1.2  |
| UL = $I_{\text{DS8}}/I_{\text{DS6}}$ |       | 2.1   | 2.0   | 1.7   | ... | 1.4  | 1.2  | 1.2  | 1.2  |
| 2nm $I_{\text{DS6}}/I_{\text{DS4}}$  |       | 3.0   | 3.0   | 2.7   | ... | 1.7  | 1.7  | 1.8  | 1.9  |

**Table S5.** Benchmark of 4 nm gate length ML antimonene MOSFETs performance compares with ITRS

HP goals.

|                | Transmission direction $\theta$ ( $^{\circ}$ ) | $I_{on}$ ( $\mu\text{A}/\mu\text{m}$ ) | SS (mV/dec) | $C_g$ (fF/ $\mu\text{m}$ ) | $\tau$ (ps) | PDP (fJ/ $\mu\text{m}$ ) |
|----------------|------------------------------------------------|----------------------------------------|-------------|----------------------------|-------------|--------------------------|
| ITRS HP goals  | -                                              | 900                                    | -           | 0.600                      | 0.423       | 0.240                    |
| UL = 0 nm      | $0^{\circ}$                                    | 312                                    | 148         | 0.297                      | 0.609       | 0.069                    |
|                | $10.9^{\circ}$                                 | 247                                    | 150         | 0.369                      | 0.948       | 0.067                    |
|                | $16.1^{\circ}$                                 | 236                                    | 152         | 0.390                      | 0.898       | 0.068                    |
|                | $19.1^{\circ}$                                 | 394                                    | 141         | 0.317                      | 0.545       | 0.063                    |
|                | $30^{\circ}$                                   | 154                                    | 165         | 0.357                      | 1.437       | 0.079                    |
|                | UL = 1 nm                                      | $0^{\circ}$                            | 1002        | 124                        | 0.125       | 0.080                    |
| $10.9^{\circ}$ |                                                | 842                                    | 130         | 0.332                      | 0.252       | 0.073                    |
| $16.1^{\circ}$ |                                                | 832                                    | 131         | 0.362                      | 0.278       | 0.069                    |
| $19.1^{\circ}$ |                                                | 1483                                   | 118         | 0.213                      | 0.092       | 0.073                    |
| $30^{\circ}$   |                                                | 664                                    | 134         | 0.204                      | 0.197       | 0.071                    |

The transmission pathway in channel regions of ML antimonene MOSFETs along  $10.9^{\circ}$ ,  $16.1^{\circ}$  and  $19.1^{\circ}$  are shown in Figure S2. All the transmission pathway is obtained at on-state. The number and strength of red transmission arrows disturbing the transmission efficiency is proportional with the effective mass. Particularly there is only few red arrows in  $10.9^{\circ}$  case blocking the transmission of blue arrows, indicating the scattering intensity in channel region varies proportional with the effective mass.

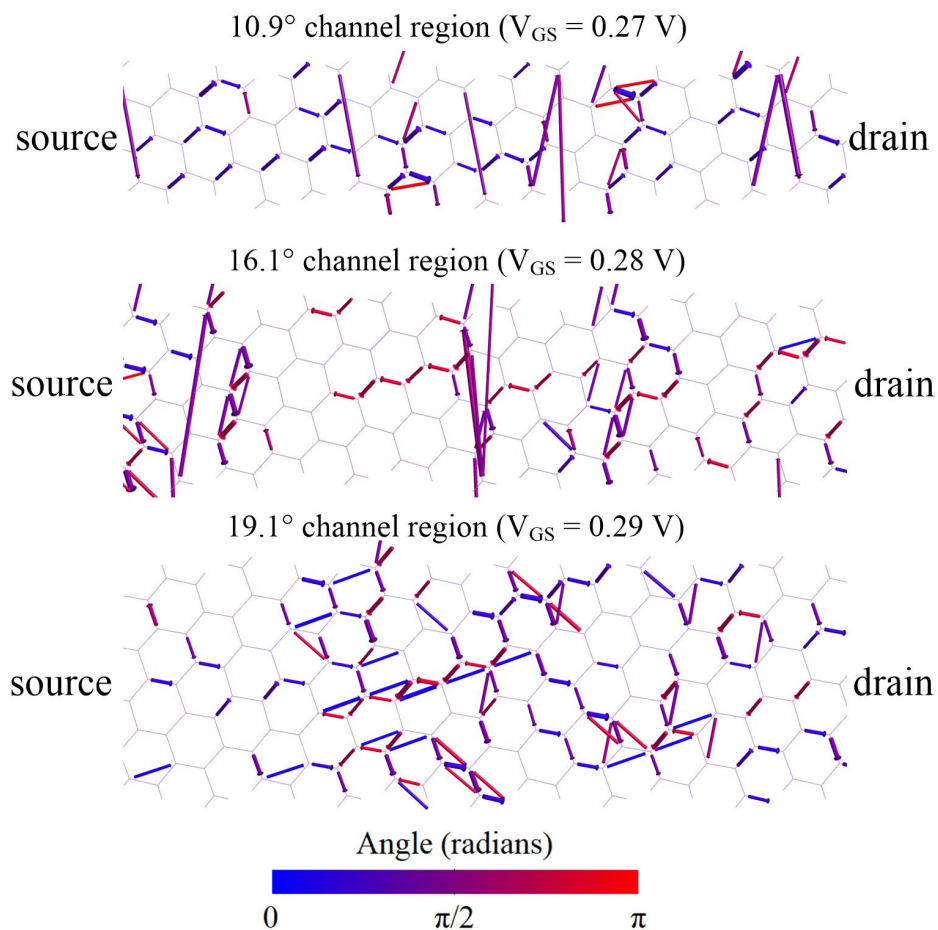

**Figure S2.** Transmission pathway in channel regions of ML antimonene along 10.9°, 16.1° and 19.1° directions, with the threshold set to 0.15 au.

Band structures along different transmission directions and the unit cells along these directions are shown in Figure S3. Bandgap changed by the SOC effect are shown in Table S6. The dispersion in valence band is more obvious than that of conduction band consistent with the previous calculation.<sup>1</sup>

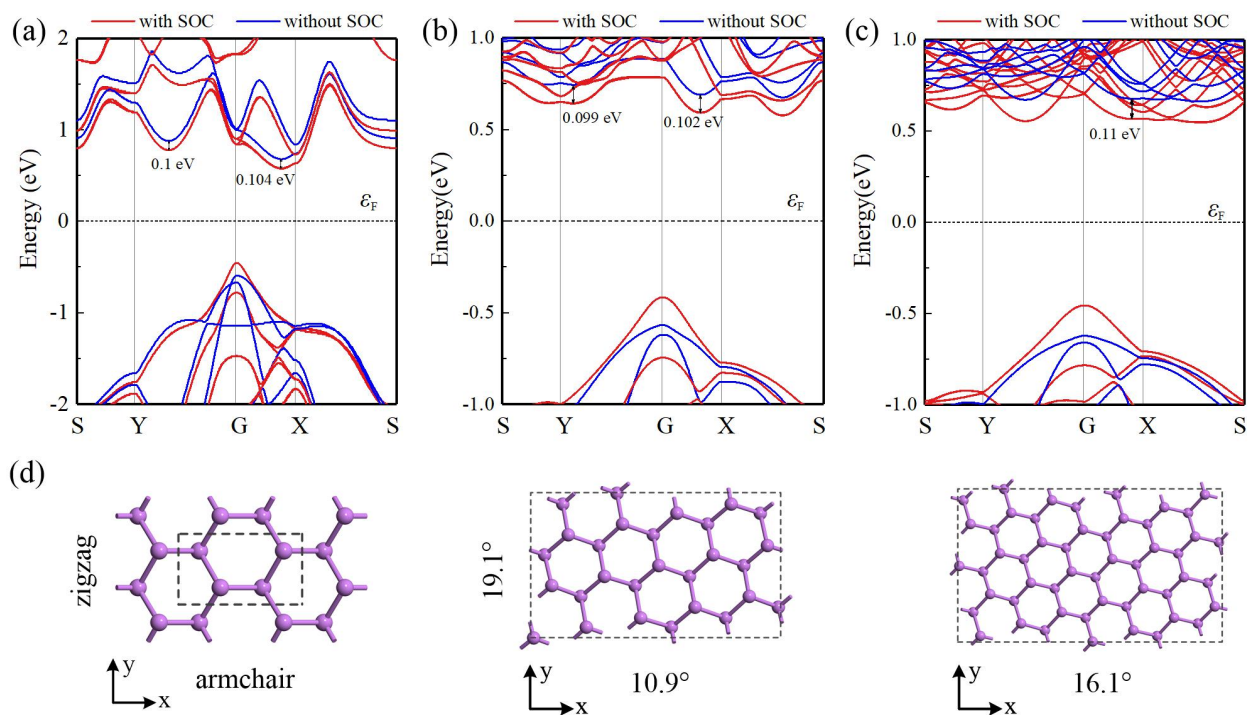

**Figure S3.** Comparisons of band structures along (a)  $0^\circ$  and  $30^\circ$ , (b)  $10.9^\circ$  and  $19.1^\circ$ , (c)  $16.1^\circ$  directions ML antimonene with and without SOC.

**Table S6.** Comparisons of bandgap along different transmission directions with and without SOC.

|             |              | Transmission direction $\theta$ ( $^\circ$ ) | $0^\circ$ | $10.9^\circ$ | $16.1^\circ$ | $19.1^\circ$ | $30^\circ$ |
|-------------|--------------|----------------------------------------------|-----------|--------------|--------------|--------------|------------|
| Without SOC | Bandgap (eV) |                                              | 1.472     | 1.242        | 1.3          | 1.311        | 1.274      |
| With SOC    | Bandgap (eV) |                                              | 1.233     | 0.992        | 1.023        | 1.057        | 1.031      |

## REFERENCES

- Pizzi, G.; Gibertini, M.; Dib, E.; Marzari, N.; Iannaccone, G.; Fiori, G. Performance of Arsenene and Antimonene Double-Gate MOSFETs from First Principles. *Nat. Commun.* **2016**, *7* (12), 12585.
